# Supplementary material for: Hemimethylation of CpG dyads is characteristic of secondary DMRs associated with imprinted loci and correlates with 5-hydroxymethylcytosine at paternally methylated sequences
Source: PubMed Central journal article supplement (PMC6796366; doi:10.1186/s13072-019-0309-2), 2019-10-17

A

paternally methylated

maternally methylated

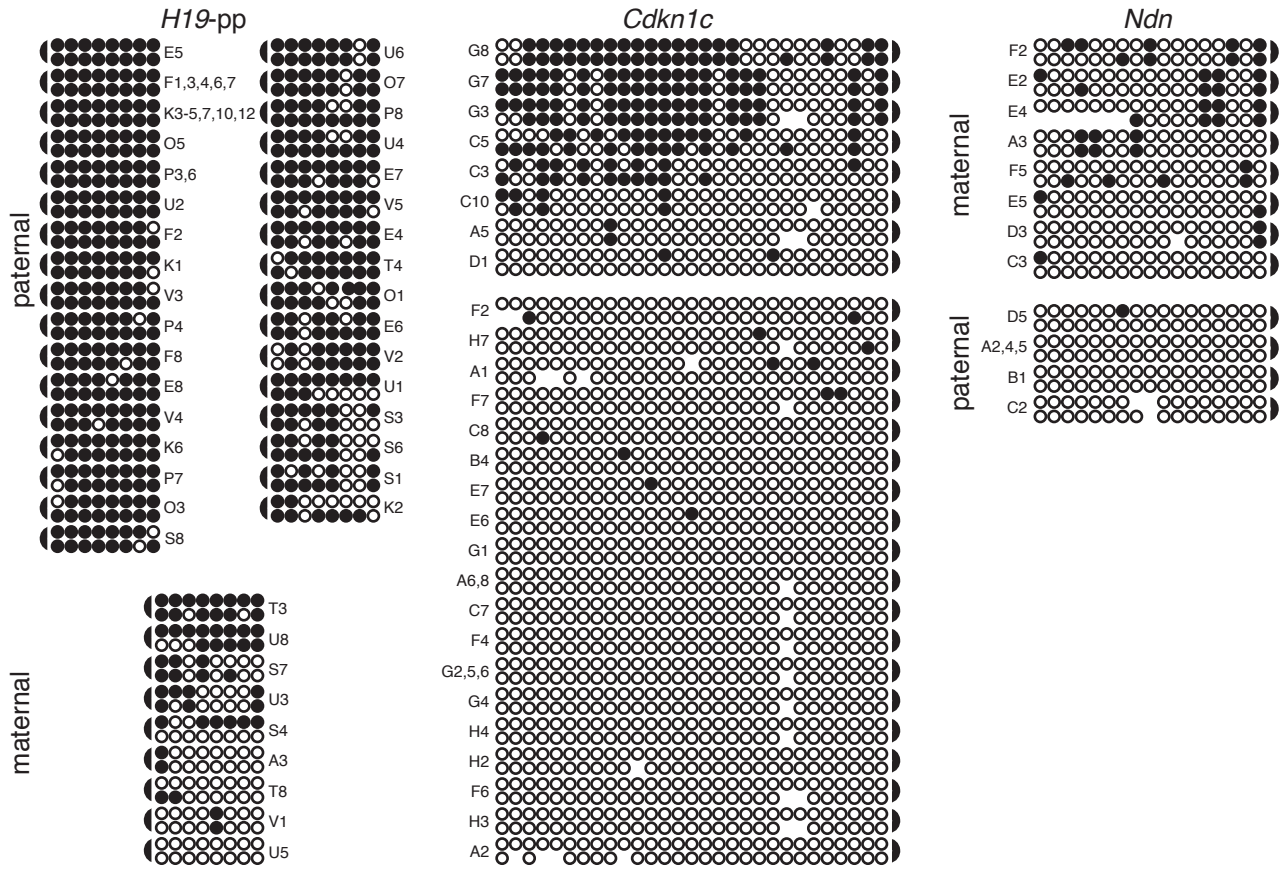

B paternally methylated

maternally methylated

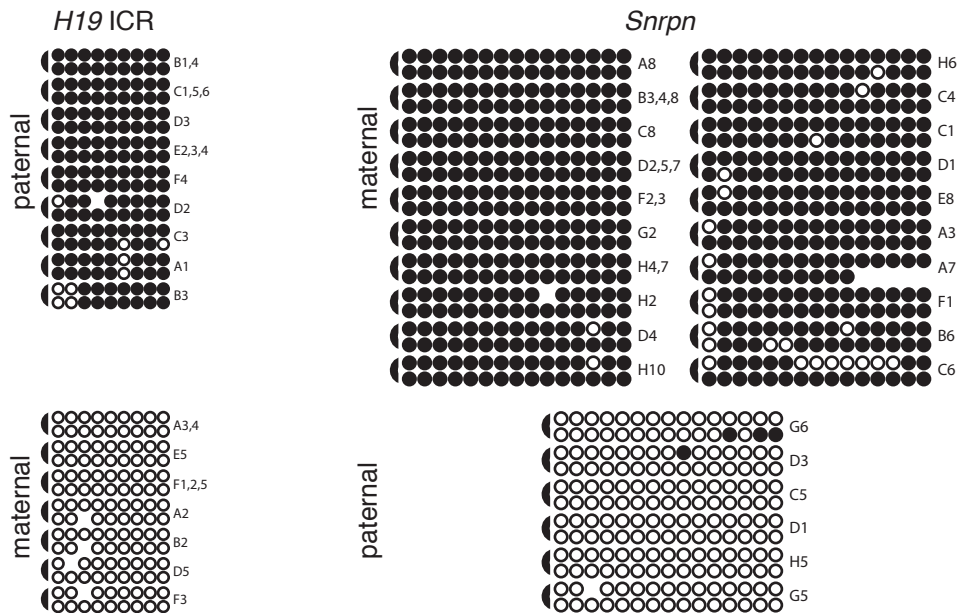

Supplement: 13072_2019_309_MOESM10_ESM.pdf [file 13072_2019_309_MOESM10_ESM.pdf]
