# Supplementary material for: Hemimethylation of CpG dyads is characteristic of secondary DMRs associated with imprinted loci and correlates with 5-hydroxymethylcytosine at paternally methylated sequences
Source: Epigenetics Chromatin. 2019 Oct 17;12:64. doi: 10.1186/s13072-019-0309-2 (PMC6796366; doi:10.1186/s13072-019-0309-2)
Supplement: Supplementary file 1 — Additional file 1. Methylation levels at imprinted DMRs generally do not vary across development. Mann–Whitney U tests were performed to compare methylation patterns on maternal and paternal alleles at each primary and secondary DMR across development. In general, methylation levels on each parental allele did not significantly change across development, illustrating that overall levels of methylation are maintained developmentally once they are established. [file 13072_2019_309_MOESM1_ESM.xlsx]

## Sheet: Sheet1
Mann-Whitney U test P values obtained when comparing maternal or paternal allele-specific methylation levels between different developmental stages
H19 ICR
maternal alleles		7.5 dpc embryo	14.5 dpc embryo	5 dpp liver
	14.5 embryo	0.5157
	5 dpp liver	0.8415	0.749
	adult liver	0.8337	0.6818	1
paternal alleles		7.5 dpc embryo	14.5 dpc embryo	5 dpp liver
	14.5 embryo	0.9203
	5 dpp liver	0.4295	0.4354
	adult liver	0.0394	0.0271	0.3371
Snrpn
maternal alleles		7.5 dpc embryo	14.5 dpc embryo	5 dpp liver
	14.5 embryo	0.1164
	5 dpp liver	0.0111	0.0414
	adult liver	0.0394	0.6384	0.0969
paternal alleles		7.5 dpc embryo	14.5 dpc embryo	5 dpp liver
	14.5 embryo	0.234
	5 dpp liver	0.7114	0.4654
	adult liver	0.9442	0.242	0.5961
H19-ppDMR
maternal alleles		7.5 dpc embryo	14.5 dpc embryo	5 dpp liver
	14.5 embryo	1
	5 dpp liver	0.6384	0.6818
	adult liver	0.2041	0.6599	0.0719
paternal alleles		7.5 dpc embryo	14.5 dpc embryo	5 dpp liver
	14.5 embryo	0.1389
	5 dpp liver	0.4593	0.0414
	adult liver	0.6455	0.3576	0.2627
Cdkn1c
maternal alleles		7.5 dpc embryo	14.5 dpc embryo	5 dpp liver
	14.5 embryo	>0.05
	5 dpp liver	0.093	>0.05
	adult liver	0.0178	>0.05	0.984
paternal alleles		7.5 dpc embryo	14.5 dpc embryo	5 dpp liver
	14.5 embryo	0.7795
	5 dpp liver	0.3472	0.5485
	adult liver	0.9124	0.8887	0.8337
Ndn
maternal alleles		7.5 dpc embryo	14.5 dpc embryo	5 dpp liver	5 dpp brain
	14.5 embryo	0.5755
	5 dpp liver	0.3953	0.7039
	5 dpp brain	0.8026	0.9124	0.5755
	adult brain	0.2801	0.5961	0.9601	0.5419
paternal alleles		7.5 dpc embryo	14.5 dpc embryo	5 dpp liver	5 dpp brain
	14.5 embryo	0.332
	5 dpp liver	0.1285	0.0673
	5 dpp brain	0.9601	0.101	0.0108
	adult brain	0.9124	0.2585	0.0271	0.6384
Peg12
maternal alleles		7.5 dpc embryo	14.5 dpc embryo	5 dpp liver
	14.5 embryo	0.1556
	5 dpp liver	0.003	0.0615
	adult liver	0.0102	0.1499	0.4295
paternal alleles		7.5 dpc embryo	14.5 dpc embryo	5 dpp liver
	14.5 embryo	0.4902
	5 dpp liver	0.4777	1
	adult liver	0.3421	0.0316	0.0226
