# Supplementary material for: Hemimethylation of CpG dyads is characteristic of secondary DMRs associated with imprinted loci and correlates with 5-hydroxymethylcytosine at paternally methylated sequences
Source: Epigenetics Chromatin. 2019 Oct 17;12:64. doi: 10.1186/s13072-019-0309-2 (PMC6796366; doi:10.1186/s13072-019-0309-2)
Supplement: Supplementary file 3 — Additional file 3. Dinucleotide frequencies at paternally- and maternally-methylated DMRs associated with imprinted genes. Frequencies were calculated as described in “Methods” using data coordinates provided in Xie et al. [35]. [file 13072_2019_309_MOESM3_ESM.xlsx]

## Sheet: dinucleotide content of DMRs
		locus	CpG	GpC	ApT	TpA	ApA+TpT	ApC+GpT	ApG+CpT	CpA+TpG	CpC+GpG	GpA+TpC
paternally methylated primary DMRs
		Dlk-Gtl2	0.0277778	0.0620155	0.0585702	0.0630922	0.119078	0.131137	0.143626	0.160853	0.128984	0.104866
		H19	0.0294393	0.0630841	0.0626168	0.046729	0.12757	0.113084	0.131776	0.162617	0.149065	0.114019
		Rasgrf1	0.0102227	0.0473475	0.0661788	0.0536963	0.16959	0.103949	0.150221	0.153664	0.11966	0.125471
	average		0.0224799	0.0574824	0.0624553	0.0545058	0.138746	0.116057	0.141874	0.159045	0.13257	0.114785
maternally methylated primary DMRs
		Aim-Igf2r	0.0613961	0.0967199	0.0353238	0.0210261	0.102607	0.0883095	0.13709	0.137931	0.203532	0.116064
		CommdI	0.0503846	0.0784615	0.0446154	0.0476923	0.125	0.114615	0.137308	0.139615	0.156154	0.106154
		Gnas1a	0.0852018	0.112108	0.0325112	0.0347534	0.0661435	0.10426	0.130045	0.128924	0.205157	0.100897
		Herc-Nap1I5	0.0203562	0.0636132	0.0559796	0.043257	0.183206	0.114504	0.142494	0.170483	0.0941476	0.111959
		Impact	0.0668069	0.135192	0.0352446	0.0252499	0.0799579	0.0910047	0.169385	0.169385	0.116781	0.110994
		Inpp5f	0.0550459	0.0825688	0.0275229	0.0458716	0.100917	0.0825688	0.192661	0.0917431	0.165138	0.155963
		Lit1	0.0598425	0.0661417	0.0393701	0.0322835	0.128346	0.120472	0.132283	0.133858	0.154331	0.133071
		Meg1	0.0477698	0.0768345	0.0520863	0.0385612	0.133237	0.106763	0.125468	0.149353	0.16	0.109928
		Nespas	0.0400988	0.0723522	0.0514311	0.0416969	0.120151	0.0954526	0.145867	0.13744	0.172163	0.123347
		Peg1	0.0378182	0.0693333	0.0487273	0.0402424	0.160485	0.100848	0.132121	0.140848	0.160485	0.109091
		Peg3	0.0281907	0.0671451	0.0568939	0.0437383	0.143858	0.0984111	0.14625	0.150521	0.144541	0.120451
		Peg10	0.0577111	0.0860776	0.0407564	0.0296707	0.118031	0.0958591	0.133029	0.135311	0.187806	0.115748
		Peg13	0.0372093	0.0729875	0.0572451	0.0440072	0.14347	0.104472	0.133453	0.153846	0.142755	0.110555
		SIc38a4	0.0505457	0.0568639	0.0384836	0.031591	0.108558	0.107984	0.138426	0.121195	0.207352	0.139001
		Snrpn-DMR1	0.0289314	0.0765282	0.0443304	0.0377975	0.113859	0.116192	0.147923	0.170322	0.157256	0.10686
		Zac1	0.0505187	0.0757781	0.0473613	0.0414975	0.154714	0.100135	0.130807	0.131258	0.156518	0.111412
	average		0.0486142	0.0805441	0.0442427	0.0374335	0.123909	0.102616	0.142163	0.141377	0.161507	0.117593
paternally methylated secondary DMRs
		Cdkn1c	0.117099	0.136208	0.0191083	0.0132288	0.0460559	0.0823126	0.137678	0.1073	0.216561	0.124449
		Dlk1	0.0314114	0.0619621	0.0473322	0.0408778	0.1321	0.1179	0.140275	0.154905	0.157057	0.116179
		Gtl2	0.0337602	0.0710128	0.0488941	0.040163	0.144645	0.0896391	0.138242	0.135623	0.1883	0.109721
		H19-Promoter	0.0303377	0.0641099	0.0440756	0.0400687	0.092158	0.107613	0.161992	0.145392	0.182026	0.132227
		Igf2r	0.132075	0.132075	0.0377358	0	0.0377358	0.132075	0.0754717	0.169811	0.169811	0.113208
		Nesp	0.0490308	0.077309	0.0355758	0.0380844	0.122919	0.0985177	0.158039	0.124287	0.168985	0.127252
		Zdbf2	0.0200123	0.0550337	0.0664693	0.0576884	0.176332	0.110169	0.142026	0.153972	0.102614	0.115683
	average		0.0591039	0.0853873	0.0427416	0.032873	0.107421	0.105461	0.136246	0.141613	0.169336	0.119817
maternally methylated secondary DMRs
		CommdI-DMR2	0.0268456	0.0604027	0.0469799	0.033557	0.134228	0.100671	0.154362	0.147651	0.161074	0.134228
		Gtl2	0.0635838	0.130058	0.0144509	0.0115607	0.083815	0.0809249	0.156069	0.153179	0.210983	0.0953757
		Magel2	0.0302326	0.0686047	0.0523256	0.0581395	0.124419	0.110465	0.167442	0.143023	0.122093	0.123256
		Magel-Mrkn3	0.0348993	0.052349	0.0469799	0.0348993	0.14094	0.128859	0.127517	0.158389	0.15302	0.122148
		Mrkn3	0.0434028	0.0885417	0.0451389	0.0277778	0.130787	0.083912	0.145833	0.146412	0.170139	0.118056
		Ndn	0.0682731	0.120482	0.0281124	0.0200803	0.0883534	0.0722892	0.164659	0.136546	0.184739	0.116466
		Peg12	0.112887	0.13986	0.015984	0.00799201	0.0529471	0.0689311	0.12987	0.103896	0.256743	0.110889
		Snrpn-Uexon	0.016129	0.0806452	0.0483871	0.0483871	0.225806	0.0806452	0.16129	0.145161	0.0967742	0.0967742
		U80893	0.00592417	0.0402844	0.0781991	0.0533175	0.207346	0.0900474	0.148104	0.148104	0.0900474	0.138626
	average		0.0446864	0.086803	0.0418397	0.0328568	0.132071	0.0907494	0.150572	0.142485	0.160624	0.117313
